# Supplementary material for: On the Behavioural Biology of the Mainland Serow: A Comparative Study
Source: MDPI journal article supplement (doi:10.3390/ani10091669), 2020-09-16
Supplement: s1 [file s1]

### Supplementary file

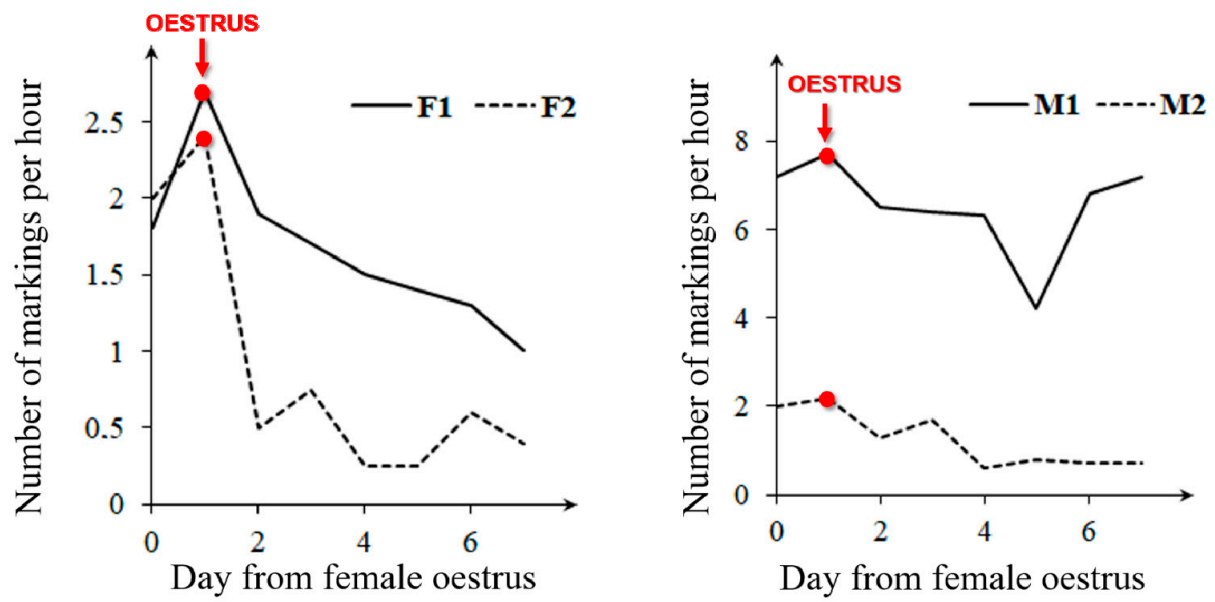

**Figure S1.**Frequency of marking events within the oestrus period. M1 – F1: pair of Dusit Zoo, M2 – F2: pair of KhaoKheow.

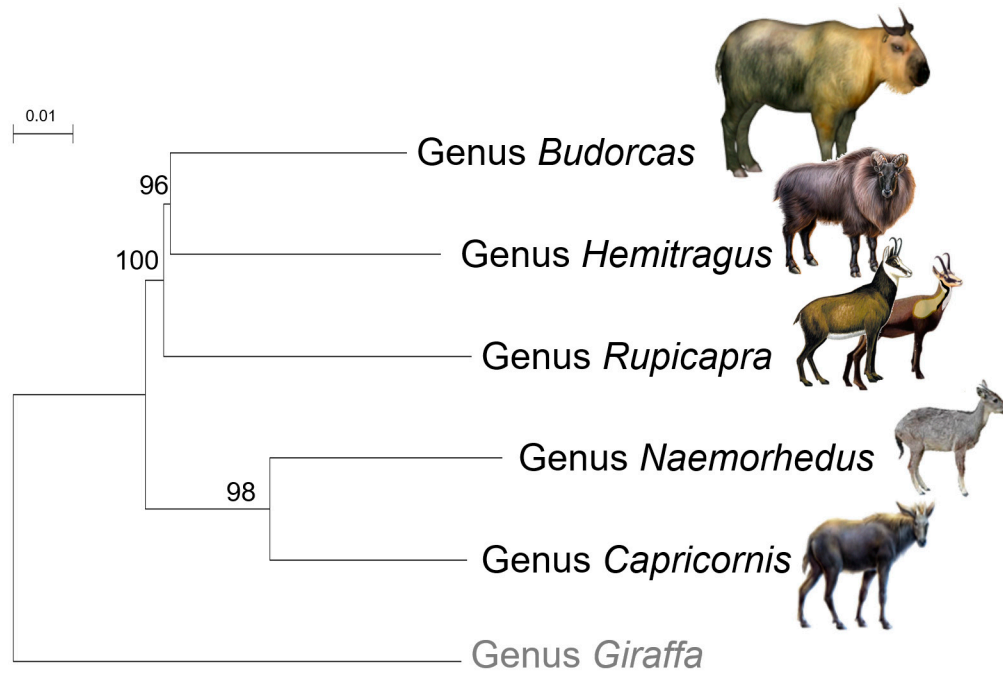

**Figure S2.** Neighbour-Joining phylogenetic tree of total mtDNA consensus sequences of Rupicaprini and Caprini genera included in our comparison. Numbers at nodes indicate bootstrap values. Sequences were retrieved from GenBank (*Capricornis*: FJ207534, NC\_020629, KU605670, KF856568, KT345703, MK303945, NC\_010640, NC\_012096 and AP003429; *Naemorhedus*: KP203894, FJ469673, FJ207532, KT878720; *Rupicapra*: NC\_020633, KJ184173; *Hemitragus*: FJ207531; *Budorcas*: MH049869, MK748332). The giraffe *Giraffacamelopardalis* (sequence NC\_024820) was used as outgroup.
